# Supplementary material for: Alterations in mechanical muscle characteristics and postural control induced by tennis match-play in young players
Source: PeerJ. 2021 May 11;9:e11445. doi: 10.7717/peerj.11445 (PMC8121060; doi:10.7717/peerj.11445)
Supplement: Supplemental Information 1 [file peerj-09-11445-s001.xlsx]

## Sheet: Subjects Charact.
PLAYER	AGE	HEIGHT	WEIGHT	BMI	ITN	DOMINANT HAND	100% HR (Tanaka)
1	19	1.8	75	23.1481	2	Right	194.7
2	15	1.76	70	22.5981	3	Right	197.5
3	18	1.85	75	21.9138	2	Right	195.4
4	18	1.74	66	21.7994	4	Right	195.4
5	15	1.78	67	21.1463	3	Right	197.5
6	16	1.77	69	22.0243	2	Right	196.8
7	17	1.82	80.3	24.2422	2	Right	196.1
8	15	1.62	56	21.3382	3	Right	197.5
9	18	1.81	70.9	21.6416	4	Right	195.4
10	15	1.65	60	22.0386	3	Right	197.5
11	15	1.66	58	21.048	3	Left	197.5
12	15	1.82	74	22.3403	3	Right	197.5
13	16	1.77	69	22.0243	3	Right	196.8
14	17	1.76	68	21.9525	3	Right	196.1
15	16	1.82	69	20.8308	2	Right	196.8
16	19	1.85	83	24.2513	2	Right	194.7
17	16	1.74	67	22.1297	3	Right	196.8
MEDIA	16.4706	1.76588	69.2471	22.1452	2.76471
SD	1.46277	0.0678287	7.12944	0.97363	0.664211

## Sheet: Muscle Stiffness Nm
	Biceps D PRE	Biceps D POST	Biceps I PRE	Biceps I POST	Biceps F. D PRE	Biceps F. D POST	Biceps F. I PRE	Biceps F. I POST	Delt D PRE	Delt D POST	Delt I PRE	Delt I POST	Gastr. D PRE	Gastr. D POST	Gastr. I PRE	Gastr. I POST	Infra D PRE	Infra D POST	Infra I PRE	Infra I POST	P. Mayor D PRE	P. Mayor D POST	P. Mayor I PRE	P. Mayor I POST	R. Fem D PRE	R. Fem D POST	R. Fem I PRE	R. Fem I POST	Abd. D PRE	Abd. D POST	Abd. I PRE	Abd. I POST	V. Med D PRE	V. Med D POST	V. Med I PRE	V. Med I POST
PLAYER	PRE	POST	PRE	POST	PRE	POST	PRE	POST	PRE	POST	PRE	POST	PRE	POST	PRE	POST	PRE	POST	PRE	POST	PRE	POST	PRE	POST	PRE	POST	PRE	POST	PRE	POST	PRE	POST	PRE	POST	PRE	POST
1	160	197	203	219	362	356	340	326	226	254	209	161	302	307	309	336	228	215	285	163	192	164	198	177	401	291	377	299	317	284	294	276	227	211	237	237
2	210	182	186	203	438	406	404	328	236	244	206	233	289	300	320	271	290	173	302	279	191	157	156	188	381	190	276	324	240	253	193	209	401	437	402	345
3	214	201	182	181	338	426	392	298	264	246	275	293	416	367	396	375	179	249	255	171	191	173	188	207	480	521	516	551	412	298	400	304	205	204	207	203
4	205	188	175	165	426	415	314	334	275	261	216	198	337	314	407	318	141	121	196	138	173	175	189	179	276	263	317	267	260	202	258	224	209	192	216	276
5	149	152	169	206	432	356	338	375	251	177	284	172	259	269	240	230	105	165	186	247	132	138	176	224	369	209	401	262	280	283	269	286	160	171	163	171
6	188	199	188	187	310	312	266	321	190	193	209	212	329	322	326	450	159	127	223	217	170	181	190	198	239	268	240	225	205	133	175	138	221	214	215	217
7	259	146	224	168	376	337	326	404	205	195	211	165	366	337	308	331	295	195	265	222	196	185	275	226	395	254	417	340	357	335	289	414	241	224	233	193
8	212	281	165	153	586	457	378	416	220	173	235	203	271	311	310	271	172	240	242	253	125	131	185	141	326	334	306	324	257	246	235	222	348	343	336	311
9	204	144	166	179	591	457	372	470	278	316	145	153	277	287	288	258	186	156	143	130	193	203	200	176	294	282	299	276	229	217	235	240	195	209	239	256
10	238	191	208	189	243	288	272	277	240	245	291	266	249	274	247	281	518	388	382	247	205	209	261	154	255	263	253	300	202	212	195	306	422	258	280	213
11	206	214	186	189	419	446	489	376	310	254	246	302	286	287	333	269	183	235	187	313	231	147	195	188	319	427	254	379	321	300	313	319	305	262	319	232
12	203	210	182	181	380	457	282	314	211	274	240	241	428	328	327	308	173	170	233	154	148	180	225	204	293	296	274	261	238	202	201	244	220	192	236	215
13	185	166	147	146	362	487	468	520	270	260	175	219	303	288	296	321	170	255	236	254	161	159	142	170	251	290	241	271	276	270	276	282	202	202	205	293
14	201	205	168	167	331	316	324	492	204	241	224	197	382	310	294	310	224	292	274	230	180	148	214	182	300	274	317	300	273	259	255	263	204	204	272	259
15	184	204	231	180	391	437	383	475	277	196	237	208	307	319	292	311	179	166	134	244	139	149	185	152	384	275	412	322	216	222	179	221	346	153	310	189
16	199	203	188	184	544	520	389	457	377	190	331	219	321	305	305	346	190	141	188	179	161	172	166	167	451	380	389	412	245	207	242	214	196	210	223	223
17	239	238	220	195	441	377	409	483	264	229	247	233	359	413	384	368	162	145	192	155	187	146	204	206	348	322	301	323	183	145	159	162	190	178	202	165
MEAN	203.294	195.353	187.529	181.882	410	402.941	361.529	392.118	252.824	232.235	234.176	216.176	322.412	314	316.588	314.941	209.059	201.941	230.765	211.529	175	165.706	197	184.647	338.941	302.294	328.824	319.765	265.353	239.294	245.176	254.353	252.471	227.294	252.647	235.176
SD	26.9438	33.593	23.041	18.6141	93.741	66.9444	63.0378	78.3142	45.7974	39.1049	44.4315	42.9465	52.7637	34.941	45.3294	52.4672	92.7783	69.0412	61.3703	53.6413	28.0245	21.9111	33.4533	24.2357	70.3451	79.4518	77.4962	75.0029	59.242	54.3826	60.6179	64.3496	79.9391	68.8901	60.0822	49.499

## Sheet: Muscle Tone (Hz)
PLAYER	Biceps D PRE	Biceps D POST		Biceps I PRE	Biceps I POST		Biceps F. D PRE	Biceps F. D POST		Biceps F. I PRE	Biceps F. I POST		Delt D PRE	Delt D POST		Delt I PRE	Delt I POST		Gastr. D PRE	Gastr. D POST		Gastr. I PRE	Gastr. I POST		Infra D PRE	Infra D POST		Infra I PRE	Infra I POST		P. Mayor D PRE	P. Mayor D POST		P. Mayor I PRE	P. Mayor I POST		R. Fem D PRE	R. Fem D POST		R. Fem I PRE	R. Fem I POST		Abd. D PRE	Abd. D POST		Abd. I PRE	Abd. I POST		V. Med D PRE
	PRE	POST		PRE	POST		PRE	POST		PRE	POST		PRE	POST		PRE	POST		PRE	POST		PRE	POST		PRE	POST		PRE	POST		PRE	POST		PRE	POST		PRE	POST		PRE	POST		PRE	POST		PRE	POST		PRE
1	14.3	14.3		13	13.7		18.5	18.5		19.4	18.3		15	15.4		14.3	12.8		17.6	18.5		17.9	20		15.3	14.5		16.9	13		12.5	11.4		12.6	11.3		19.5	15.9		19.7	16.2		16.9	17.1		16.2	17.2		14.6
2	13.7	12.8		13.2	13.4		19.7	19.9		19.3	17.5		14.5	15.7		14.4	15		17.4	17.9		18.9	16.5		16.8	13.4		16.3	15.1		13.5	12		13	12.8		18.6	13.5		16	18.5		13.7	14.1		12.8	12.8		19.8
3	12.7	14		12.2	11.7		18.4	21.1		20	16.8		16.3	15.2		16.7	16.8		21.8	19.7		20.9	19.8		13.6	15.6		15.1	12.9		11.6	11.6		12.3	12.4		21.5	22.9		24	25.3		18.3	15.8		19.7	16.9		13.5
4	14	14		12.6	11.6		21.1	19.6		17.8	17.7		15.3	15.2		14.3	13.6		19	18.6		21	18.7		12.1	11.3		13.4	11.7		11.2	11		12.4	11.1		14.9	15		16.7	14.7		13.7	11.7		13.4	12.9		13.5
5	12	11.6		13.4	14.4		19.7	17.6		17.1	18		15.1	12.3		17.1	13.4		15.1	15.7		14.7	14.3		30.7	13.2		35.2	15.7		11.7	12.1		12.8	15		18.7	14.4		19.8	15.4		15	15.4		15.5	16.3		12.9
6	13.6	13.9		12.5	12.7		17	16.6		15.6	17.3		13.6	13		14.3	13.8		18.6	18.7		18.7	22.7		12.7	11		14.7	14.4		10.8	11.1		11.9	12.3		14	16.8		13.9	13.4		13	11.7		13	12		13.8
7	16.5	12.6		14.4	12.5		19.3	17.4		17.8	18.6		14.1	13.8		14.4	13.7		20.2	19.2		18.1	18.9		17	14.2		16.2	14.3		13.5	13.3		15.3	14.8		19.5	15.4		20.4	17		17.2	15.8		15.6	18.3		14.3
8	12.8	16.2		12	11.6		24.1	20.5		19.3	19.8		14.8	13.7		14.8	14.1		16.1	18		18.6	16.5		13.3	15.2		15	15.2		11.2	11.3		13	11.8		17.2	17.5		16.1	17		16.2	13.1		14.6	14		17.3
9	13.7	11.9		12.3	12.9		23.6	20.7		18.7	21		16.6	17.8		12.3	13		16.7	17.1		17.1	14.4		13	12.5		12.3	11.7		12.5	13.2		13.4	12.9		16.9	15.9		15.9	15.1		13.1	13		13	13.5		14.1
10	14.8	12.4		12.7	11.9		14.9	15.8		15.9	15.7		14.9	14.7		16.5	15.8		15.5	15.9		14.6	16.4		21.8	18.3		17.4	14.9		13.5	13.4		14.9	11.6		15.3	15.6		14.9	16.8		12.5	12.3		12.9	15.3		19.7
11	14.4	14.8		12.2	13.4		20.7	20.6		22.5	19.1		17.2	15.5		15.3	17		16.6	16.9		18.8	15.9		14.4	13.8		14	16.8		14	12.2		13.8	13.2		16.6	19.5		14.8	18.8		16.8	17.7		19.2	15.7		17.1
12	14	14.4		13.2	12.5		18.4	20.4		15.6	16.4		13.4	15.9		15	14.6		21.7	18.6		18.8	17.6		13.4	13.4		14.9	13		10.5	11.5		13.7	12.9		15.5	15.1		15.6	14.9		14.1	13		13.4	14.1		14
13	13.1	11.8		13.7	11.7		19.3	23.5		21.5	22.5		15.5	15.1		13.3	14.9		17.8	16.5		16.7	17.5		13.7	15.6		15.3	15.9		11.1	12		11.7	12		15.3	16.6		14.8	16.5		14.5	15.3		14.7	16.3		13.4
14	13.3	13.7		12.4	12.6		17.3	16.6		17.5	19.4		13.8	14.7		15.2	14.7		20.2	17.4		16.4	17.2		14.5	15.8		16.1	15		11.7	11		13.5	12.4		16.1	16.1		17.2	16.3		14.8	14.7		14.4	14.9		14.4
15	13	14.7		14.6	12.5		19.2	20.7		18.5	20.5		16.5	13.5		15.3	14.5		17.8	18.7		17	17.6		12.9	12.8		11.8	15.6		11.6	12.1		13	12.2		18.5	16.4		19.1	17		13.2	13.7		12.3	13.2		19.3
16	13.7	13.9		12	11.4		25.3	23.6		21.6	22.6		18.7	14		17.6	14.2		18.6	18.2		17.7	19.1		14.2	12		14	12.7		12.1	11.6		12.2	12.1		21.3	19.4		19.7	20.4		14.8	13.3		13.8	13.9		13.6
17	15.6	14.8		14	13.3		21.5	19.7		19.2	21.6		15.8	15.1		15	14.4		20.4	22.1		21.7	20.6		12.9	12.6		13.6	12.9		12.6	11.5		13.2	13.6		18	16.6		16.3	17.7		12.7	11.8		12.1	12.5		13.1
MEAN	13.8353	13.6353		12.9647	12.5765		19.8824	19.5765		18.6647	18.9882		15.3588	14.7412		15.0471	14.4882		18.3	18.1		18.0941	17.8647		15.4294	13.8353		16.0118	14.1647		12.0941	11.9		13.1	12.6118		17.4941	16.6235		17.3471	17.1176		14.7353	14.0882		14.5059	14.6941		15.2
SD	1.09256	1.26686		0.823818	0.862068		2.65806	2.24876		2.03928	2.09161		1.38972	1.28358		1.34402	1.17892		2.03531	1.52684		1.97657	2.20254		4.56752	1.86177		5.17565	1.53783		1.05325	0.768928		0.965013	1.08102		2.21147	2.23258		2.67678	2.69774		1.76314	1.86242		2.20439	1.84948		2.42307
[truncated: 3 more columns]

## Sheet: Relaxation Time (ms)
PLAYER	Biceps D PRE	Biceps D POST		Biceps I PRE	Biceps I POST		Biceps F. D PRE	Biceps F. D POST		Biceps F. I PRE	Biceps F. I POST		Delt D PRE	Delt D POST		Delt I PRE	Delt I POST		Gastr. D PRE	Gastr. D POST		Gastr. I PRE	Gastr. I POST		Infra D PRE	Infra D POST		Infra I PRE	Infra I POST		P. Mayor D PRE	P. Mayor D POST		P. Mayor I PRE	P. Mayor I POST		R. Fem D PRE	R. Fem D POST		R. Fem I PRE	R. Fem I POST		Abd. D PRE	Abd. D POST		Abd. I PRE	Abd. I POST		V. Med D PRE
	PRE	POST		PRE	POST		PRE	POST		PRE	POST		PRE	POST		PRE	POST		PRE	POST		PRE	POST		PRE	POST		PRE	POST		PRE	POST		PRE	POST		PRE	POST		PRE	POST		PRE	POST		PRE	POST		PRE
1	20.9	23.3		22.8	20.9		14.2	14.1		14.2	15.2		20.5	19.2		19.7	23.3		17.3	16		16.7	15		18.9	21.5		15.3	21.1		25.6	28.2		25.4	29		12.8	17.1		13.5	16		15.6	17.1		17.5	17.1		19.9
2	22.9	25.6		25	23.4		11.6	12.5		12.5	15.1		22.1	18		20.6	18.6		17.7	16.5		15.3	18.3		14.9	18.4		16.7	18.1		24.3	25.6		22.5	25.1		12.7	19		16.2	13.8		20.6	19.8		24	23.5		12.2
3	21.6	23.2		27.7	27.2		14.6	12.3		12.8	16.6		18.5	18.5		15.9	15.3		12.4	13.7		13.1	14		19.6	19.6		19.3	25.3		27.2	28.4		27	26		10.6	9.9		9.9	9.3		12.9	18.1		12.5	16.8		20.7
4	20.9	22.9		25.6	26.1		11.6	12.2		15.4	14.8		19	19.2		19.9	19.9		14.6	15.3		12.2	15.4		24.9	24.9		24.1	24.5		29.3	29.1		26.4	29.7		19.2	18.4		16	19.6		19.6	24.6		20.8	20.7		23.4
5	21.8	22.3		20.1	18.8		11.9	14.2		14.9	13.7		19.8	26.5		15.9	19.8		20.7	19.1		21.3	22.4		9.7	21.4		9	18.1		24.1	24.2		24.7	19.3		13.1	19.2		12.3	17.1		17.8	18.2		17	17.1		21.1
6	23.7	23.1		24.8	24.5		16	16.5		18.5	16.5		23.3	24.9		20.1	22.5		15.9	16		15.7	11.6		23.8	26.2		19.7	20.5		28.7	28.3		27	26.2		20.8	15.2		21.4	21.7		23.6	25		20.1	23.3		21.7
7	17.3	21.3		20.4	22.8		13.3	15		15.5	12.7		22.4	23.5		21.4	20.5		13.8	15.2		16.6	15.5		16.5	20.6		18.1	20.4		20.2	21		16.6	19		12.9	17.7		12.3	14.5		13.6	15.2		16.7	11.4		20.7
8	20.8	16.2		23.2	22.5		8.5	11.2		13.1	12.2		18.7	19.2		17.8	18.3		18.8	15.6		16.5	19.5		20.5	18.2		17.6	17.5		25.4	24.6		24.2	22.2		14.5	14.5		15.9	14.8		17.8	21.1		20.8	20.8		14.3
9	22.3	22.4		25.1	24.5		8.7	10.9		13.3	10.9		17.5	16		24.2	21		18.5	17.8		17.5	22.8		24.8	23.8		23	25.1		25.7	24.3		21.8	22.9		17.2	18.1		18.1	18.6		20.9	22.1		20.8	20.7		20.3
10	19.1	23.8		23	22.5		19.3	17.4		17.5	17.7		19	18.6		14.7	16.4		19.6	19.2		22.3	18.6		10.7	13.7		12.7	18.8		20.7	21.7		18.2	25.1		17.2	16.4		19.3	15.4		23.3	24.1		22	17.7		11.7
11	22.7	22.4		25.9	22.6		11.5	11.3		10.4	13.1		15.2	18.2		18.1	16		20	19.1		15.1	20.4		19.2	23.2		21.8	16.1		20	22.5		22.9	23.2		16.9	12.3		19	13.3		17	17.2		15.9	17.1		15.9
12	21.2	21.5		22.8	23.4		12.7	10.8		16.3	15.5		23	17.9		18.8	21.1		11.8	15.6		15.6	17.5		19.5	20		20.1	22.2		28.4	26.5		21.1	23		17	17		17.4	19.7		20.7	22.9		23.2	20.5		21.4
13	24.5	26.9		23.1	25.5		13.5	10.3		10.6	9.7		18.8	19.5		21.4	17.8		16.9	17.6		17.8	16.5		19.9	18.5		19.7	17.7		26.4	22.3		24.2	26.5		20.1	17.9		21	18.6		19.1	18.2		19.3	17.9		23.5
14	21.5	22.2		21.6	23.2		14.7	15.6		14.7	10.3		21.5	20.1		17.9	17.4		13.3	17.3		19.1	16.8		21	18.6		17.7	20.5		27.8	27.3		23	23.9		16.3	16		15.9	15.5		17.5	18.2		19.5	18.1		19.3
15	24	22.4		19.1	25.3		12.9	11.7		12.9	10.8		15.9	21.7		16.4	17.6		17.2	16.2		18.4	16.7		23.6	21.5		23.1	19.8		24.7	24.6		23.2	23.5		13.2	16.6		12.7	15.3		19.6	21.6		21.9	21.5		14.3
16	23.8	23		25.7	26.2		9.2	9.8		12.8	10.6		13.6	20.4		14.2	19.4		16	17.4		16.8	14.7		20.8	23.3		20	26.1		24.1	26.8		24.3	25.2		11.2	13.4		12.6	11.9		20.1	20.5		19.5	20.6		20.9
17	19.1	19.7		21.3	23		11.5	13.2		12.9	10.6		18.7	20.3		19.7	21		14.3	12.1		13.5	13.9		20.3	21.6		22.9	21.3		24.3	24.7		22.5	21.6		14.7	15.7		17	15.7		22.3	23		21.9	20.7		23.9
MEAN	21.6529	22.4824		23.3647	23.6706		12.6882	12.8824		14.0176	13.2941		19.2647	20.1		18.6294	19.1706		16.4	16.4529		16.6765	17.0353		19.3294	20.8824		18.8706	20.7706		25.1118	25.3		23.2353	24.2		15.3176	16.1412		15.9118	15.9294		18.9412	20.4059		19.6118	19.1471		19.1294
SD	1.92974	2.27328		2.36245	2.07659		2.70622	2.24729		2.18953	2.55868		2.73335	2.68701		2.65513	2.27177		2.70231	1.89839		2.66048	3.03458		4.34378	3.00026		3.93697	3.01367		2.83282	2.51346		2.79999	2.90431		3.06273	2.48673		3.30376	3.08722		3.04694	2.94395		2.92636	2.94196		3.92186
[truncated: 3 more columns]

## Sheet: Muscle Elasticity (Dm)
PLAYER	Biceps D PRE	Biceps D POST		Biceps I PRE	Biceps I POST		Biceps F. D PRE	Biceps F. D POST		Biceps F. I PRE	Biceps F. I POST		Delt D PRE	Delt D POST		Delt I PRE	Delt I POST		Gastr. D PRE	Gastr. D POST		Gastr. I PRE	Gastr. I POST		Infra D PRE	Infra D POST		Infra I PRE	Infra I POST		P. Mayor D PRE	P. Mayor D POST		P. Mayor I PRE	P. Mayor I POST		R. Fem D PRE	R. Fem D POST		R. Fem I PRE	R. Fem I POST		Abd. D PRE	Abd. D POST		Abd. I PRE	Abd. I POST		V. Med D PRE
	PRE	POST		PRE	POST		PRE	POST		PRE	POST		PRE	POST		PRE	POST		PRE	POST		PRE	POST		PRE	POST		PRE	POST		PRE	POST		PRE	POST		PRE	POST		PRE	POST		PRE	POST		PRE	POST		PRE
1	1.26	1.42		1.02	1.17		0.93	0.93		0.58	0.88		0.75	0.98		0.86	0.87		0.98	0.74		0.96	0.81		0.64	0.61		0.55	0.55		1	0.98		1.05	1.11		0.91	0.99		0.85	0.9		1.63	1.54		1.14	1.46		0.78
2	1.02	1.33		0.92	1.27		0.82	0.68		0.85	0.73		0.92	0.86		0.73	0.74		0.89	0.76		0.77	0.78		0.7	0.54		1.03	0.81		0.8	1.02		0.65	1.13		0.68	0.81		0.79	0.52		1.09	1.7		1.04	1.3		0.59
3	1.43	1.27		0.99	1.31		0.96	1.05		0.86	1.15		0.77	0.93		0.77	0.86		0.92	0.93		1	0.95		0.62	0.83		0.71	0.72		1.45	1.18		1.15	1.21		0.82	0.96		0.88	0.95		1.54	1.63		1.31	1.27		0.89
4	1.1	1.15		1	1.29		1.08	0.98		0.83	0.93		0.99	0.98		0.71	0.79		0.73	0.66		0.71	0.77		0.65	0.62		0.59	0.7		1.05	1.15		1.01	1.27		1.18	0.84		0.89	1.42		1.23	1.16		1.11	1.17		0.88
5	1.03	1.25		0.76	0.62		0.72	0.96		0.88	0.82		0.82	0.83		0.78	0.73		0.96	0.89		0.75	0.93		1.43	0.68		1.47	0.65		1.03	0.95		1.05	0.77		0.65	0.7		0.67	0.68		1.23	1.55		1.27	1.22		0.7
6	0.94	0.74		1.01	0.9		0.91	1.23		0.92	1.03		0.74	0.99		0.91	0.89		0.89	0.91		0.87	0.83		0.62	0.83		0.63	0.6		1.24	1.28		1.22	1.29		1.1	0.57		1.16	1.01		1.05	0.71		0.7	0.7		0.81
7	0.89	0.9		0.88	0.9		1.08	0.88		0.98	0.85		0.72	0.7		0.73	0.66		0.84	0.83		0.93	0.78		0.66	0.57		0.73	0.64		0.74	0.88		0.82	0.82		0.8	0.93		0.95	0.9		1.2	1.09		1.28	0.79		0.99
8	1.39	0.97		1.04	1.2		0.72	0.86		0.89	0.92		0.75	0.7		0.93	0.79		0.9	0.8		0.76	0.83		0.62	0.67		0.68	0.63		1.01	0.99		0.82	0.99		0.79	0.8		0.91	0.82		1.25	2.05		1.1	1.41		0.9
9	1.39	1.47		0.97	0.81		0.9	0.83		0.9	0.82		0.9	1.05		0.69	0.65		0.94	0.95		0.93	1.11		0.71	0.62		0.62	0.62		1.06	1.04		0.95	0.93		0.95	0.99		1.56	1.25		1.35	1.03		1.37	0.99		0.71
10	0.82	1.06		1.02	1.3		0.58	0.7		0.62	0.58		0.78	0.8		0.73	0.79		0.79	0.89		1.29	1.04		0.96	0.81		0.69	0.65		0.96	0.82		0.82	1.06		0.8	0.66		1.08	0.71		1.09	1.2		0.9	1.19		0.51
11	1.14	1.47		1.13	1.04		0.67	0.71		0.89	0.68		0.95	0.82		0.79	0.94		1.13	0.98		1.04	0.93		0.59	0.88		0.69	0.96		1.03	0.88		0.76	0.87		1.12	0.84		0.91	0.77		1.57	2.13		2.04	1.72		0.9
12	1.03	1.18		0.99	1.38		0.86	0.88		0.99	0.96		0.95	1.14		0.71	0.82		0.69	0.91		0.91	0.88		0.59	0.55		0.67	0.59		1.44	1.18		1.06	1.07		0.97	1.14		0.93	1		0.86	0.84		0.75	1.2		0.85
13	1.19	1.39		1.54	1.13		0.75	0.67		0.75	0.75		1.05	1.07		0.71	0.64		0.73	0.79		0.96	1.02		0.54	0.63		0.61	0.57		1.4	1.05		1.13	0.95		1.24	1.21		1.45	1.01		1.14	1.45		1.22	1.41		0.79
14	1.11	0.98		1.09	0.91		0.76	0.73		0.73	0.78		0.82	0.95		0.81	0.74		0.77	1		1.03	0.86		0.71	0.81		0.71	0.63		1.11	1.14		1.24	1.13		0.86	0.75		1	0.72		1.12	1.02		1.16	1.06		0.67
15	1.13	1.41		0.94	1.09		0.81	0.91		0.84	0.99		0.62	0.83		0.62	0.73		0.86	0.86		0.9	0.97		0.84	0.61		0.58	0.65		1.13	0.95		0.99	1.09		0.82	0.74		0.91	0.91		1.07	1.49		0.85	1.11		0.82
16	1.43	1.27		1.15	1.43		1.04	0.71		0.97	0.65		0.88	0.77		0.78	0.89		0.87	1.18		0.91	0.82		0.59	0.73		0.64	0.67		1.08	1.02		1.02	0.97		0.85	0.82		0.87	0.81		1.16	1.15		1.16	1.11		0.89
17	0.93	1.18		1.35	0.94		1.02	1.01		1.23	0.99		0.99	0.8		0.79	0.75		0.98	0.83		0.86	0.84		0.63	0.52		0.65	0.54		0.87	0.81		0.79	0.77		0.76	0.82		1.05	1.12		0.99	0.98		0.94	0.92		0.84
MEAN	1.13118	1.20235		1.04706	1.09941		0.859412	0.865882		0.865294	0.853529		0.847059	0.894118		0.767647	0.781176		0.874706	0.877059		0.916471	0.891176		0.711765	0.677059		0.720588	0.657647		1.08235	1.01882		0.972353	1.02529		0.9	0.857059		0.991765	0.911765		1.21	1.33647		1.13765	1.17824		0.795294
SD	0.193484	0.213499		0.178457	0.225291		0.14868	0.155002		0.148666	0.149706		0.117886	0.12928		0.0791778	0.0888033		0.111137	0.118836		0.13711	0.100491		0.210898	0.115908		0.219615	0.101522		0.204314	0.133925		0.17057	0.161288		0.171282	0.165029		0.223613	0.219153		0.208776	0.402025		0.303655	0.251352		0.124153
[truncated: 3 more columns]

## Sheet: Postural Control
PLAYER	Total Displacement CoP (mm). Eyes Open PRE	Total Displacement CoP (mm). Eyes Open POST		Total Displacement CoP (mm). Eyes Closed PRE	Total Displacement CoP (mm). Eyes Closed POST		Surface Area (mm). Eyes Open PRE	Surface Area (mm). Eyes Open POST		Surface Area (mm). Eyes Closed PRE	Surface Area (mm). Eyes Closed POST		Average Speed of CoP (mm/s). Eyes Open PRE	Average Speed of CoP (mm/s). Eyes Open POST		Average Speed of CoP (mm/s). Eyes Closed PRE	Average Speed of CoP (mm/s). Eyes Closed POST
	PRE	POST		PRE	POST		PRE	POST		PRE	POST		PRE	POST		PRE	POST		PRE	POST		PRE	POST		PRE	POST		PRE	POST		PRE	POST		PRE	POST		PRE	POST		PRE	POST		PRE	POST		PRE	POST		PRE
1	262.9	232.2		277.9	250.5		33.3	75.1		36.4	71.5		5.1	4.5		5.4	4.9
2	482.5	544.1		684.1	768		248.2	544.1		530.3	743.9		9.4	10.6		13.4	15
3	329.1	269.1		377.8	213.6		74.5	46.6		123.3	27.4		6.4	5.3		7.4	4.2
4	494.7	337.1		686.3	386.5		99.6	62.9		87.5	72.6		9.7	6.6		13.4	7.5
5	609.2	721.4		1185.2	1124.3		609.2	447.5		514.3	578.4		11.9	14.1		23.1	22
6	562.3	555.9		920.7	537.7		237.3	298.8		272.7	151.1		11	10.9		18	10.5
7	208.3	233		303.6	253.7		44.2	94		43	52.9		4.1	4.6		5.9	5
8	448.8	820.9		809.4	1521.6		132.9	490.5		590.2	523.4		8.8	16		15.8	29.7
9	851.8	589.2		1708.5	1408.3		199.5	154		293.8	307.9		16.6	11.5		33.4	27.5
10	493.7	790.2		455.9	1925.6		331.7	912.8		441.2	995.5		9.6	15.4		8.9	37.6
11	371.9	402.7		420.5	580.7		155.9	105.5		197.1	304.7		7.3	7.9		8.2	11.3
12	273.8	282.7		447	480.9		97.1	77.6		115.4	175.2		5.3	5.5		8.7	9.4
13	348.6	441.2		470.2	512.2		47.1	85.2		67.9	69.4		6.8	8.6		9.2	10
14	482.7	702.6		688.6	595.9		183.8	396.9		201.1	195.7		9.4	13.7		13.4	11.6
15	918.6	1296.1		670.6	935.1		618.2	763		261.2	733.5		17.9	25.3		13.1	18.3
16	226.9	254.9		280.8	330.8		26.1	46.9		61	75.7		4.4	5		5.5	6.5
17	917.3	1439.8		1378	968		283	737.3		360.6	466		17.9	28.1		26.9	18.9
MEAN	487.241	583.124		692.065	752.553		201.271	314.041		246.882	326.165		9.50588	11.3882		13.5118	14.7
SD	227.081	356.449		406.4	496.909		180.116	289.077		183.45	296.175		4.43008	6.94936		7.94047	9.70077
[truncated: 3 more columns]

## Sheet: Match Load
		Speed Intervals (m)
Match	Total Distance(m)	0-1 m·s	1-2 m·s	2-3 m·s	3-4 m·s	>4 m·s	Peak Velocity m·s	Mean Velocity m·s	High Acc. (>3 m·s)	High Decel. (>3 m·s)	High Acc. (>3 m·s)/min	High Decel. (>3 m·s)/min	Peak HR	Mean HR	0-70% HR	70-85%	85-100% HR
Match 1	4775.32	1214.23	2723.75	540.71	188.27	108.27	6.08	1.17	45	62	0.59	0.82	186	154	3.18	44.07	51.45
Match 2	4130.91	1297.74	2234.74	377.32	131.79	89.33	6.41	1.07	36	70	0.47	0.91	195	163	6.65	22.85	55.25
Match 3	4057.03	1208.79	2136.38	448.12	196.51	67.23	5.74	1.1	31	51	0.42	0.69	186	149	14.18	45.12	39.8
Match 4	4229.13	1334.63	2160.99	462.92	179.42	91.17	5.31	1.06	37	78	0.49	1.04	190	156	7.35	36.94	52.25
Match 5	4059.56	1348.33	2164.81	294.09	142.12	110.2	6.73	1.03	56	40	0.71	0.51	178	138	26.34	56.42	17.24
Match 6	3908	1399.95	1828.98	452.67	160.76	65.64	5.54	1.01	50	65	0.62	0.81	177	139	24.46	58.9	16.64
Match 7	3676.17	1328.46	1825.68	373.15	112.3	36.58	5.46	1.01	42	63	0.55	0.82	171	123	45.53	44.47	10.01
Match 8	3947.93	1260.85	1888.17	499.19	229.34	70.38	5.95	1.08	45	69	0.58	0.89	193	142	27.03	35.26	33.21
Match 9	3779.85	1231.99	2045.02	334.22	112.49	56.13	6.18	1.02	34	43	0.44	0.56	190	153	10.5	44.38	40.17
Match 10	3054.29	1468.75	1136.02	292.94	99.56	57.02	6.11	0.9	21	38	0.27	0.5	174	130	43.86	46.85	9.29
MEAN	3961.82	1309.37	2014.45	407.533	155.256	75.195	5.951	1.045	39.7	57.9	0.514	0.755	184	144.7	20.908	43.526	32.531
SD	437.398	84.1772	404.027	85.8682	42.6795	23.8913	0.444383	0.07075	10.067	13.9559	0.123576	0.183258	8.40635	12.5082	15.157	10.3135	17.9761
